# Supplementary material for: Experimental and theoretical study of β-As2Te3under hydrostatic pressure
Source: Royal Society of Chemistry journal article supplement (doi:10.1039/d2tc03357g), 2022-12-22
Supplement: d2tc03357g1.pdf [file d2tc03357g1.pdf]

## Supplemental Material

### Experimental and theoretical study of $\beta$ -As<sub>2</sub>Te<sub>3</sub> under hydrostatic pressure

R. Vilaplana,<sup>1\*</sup> S. Gallego-Parra,<sup>2</sup> E. Lora da Silva,<sup>3</sup> D. Martínez-García,<sup>4</sup> G. Delaizir,<sup>5</sup> A. Muñoz,<sup>6</sup> P. Rodríguez-Hernández,<sup>6</sup> V. P. Cuenca-Gotor,<sup>2</sup> J. A. Sans,<sup>2</sup> C. Popescu,<sup>7</sup> A. Piarristeguy,<sup>8</sup> and F. J. Manjón<sup>2</sup>

<sup>1</sup> *Centro de Tecnologías Físicas: Acústica, Materiales y Astrofísica, MALTA Consolider Team, Universitat Politècnica de València, 46022 Valencia, Spain*

<sup>2</sup> *Instituto de Diseño para la Fabricación y Producción Automatizada, MALTA Consolider Team, Universitat Politècnica de València, 46022 Valencia, Spain*

<sup>3</sup> *Institute of Physics for Advanced Materials, Nanotechnology and Photonics, Department of Physics and Astronomy, Faculty of Sciences, University of Porto, 4169-007 Porto, Portugal*

<sup>4</sup> *Departamento de Física Aplicada – ICMUV, MALTA Consolider Team, Universitat de València, Burjassot, Spain*

<sup>5</sup> *Institut de Recherche sur les Céramiques (IRCER), UMR CNRS 7315, Centre Européen de la Céramique, 87068 Limoges, France*

<sup>6</sup> *Departamento de Física, Instituto de Materiales y Nanotecnología, MALTA Consolider Team, Universidad de La Laguna, Tenerife, Spain*

<sup>7</sup> *ALBA-CELLS, Cerdanyola, E-08290 Barcelona, Spain*

<sup>8</sup> *ICGM, Univ Montpellier, CNRS, ENSCM, Montpellier, France*

\* Corresponding author E-mail: [rovilap@fis.upv.es](mailto:rovilap@fis.upv.es)

**Table S1.** Experimental (Exp.) and theoretical (Th.) lattice parameters and volume corresponding to the hexagonal unit cell of the  $R\text{-}3m$  structure of  $\beta\text{-As}_2\text{Te}_3$  at ambient conditions.

|                               | <b>a (Å)</b> | <b>c (Å)</b> | <b>Volume (Å<sup>3</sup>)</b> |
|-------------------------------|--------------|--------------|-------------------------------|
| Exp. (sample #1) <sup>a</sup> | 4.042(1)     | 29.463(1)    | 416.899(4)                    |
| Exp. (sample #2) <sup>a</sup> | 4.051        | 29.498       | 419.225                       |
| Th. PBEsol <sup>a</sup>       | 4.0514       | 28.50526     | 405.205                       |
| Th. PBE+D3 <sup>a</sup>       | 4.0940       | 28.8230      | 418.460                       |
| Exp. <sup>b</sup>             | 4.047(1)     | 29.498(2)    | 418.385(7)                    |
| Exp. <sup>c</sup>             | 4.06         | 29.59        | 422.39                        |
| Th. PBE <sup>d</sup>          | 4.062        | 28.68        | 409.817                       |
| Th. GGA-WC <sup>e</sup>       | 4.110        | 29.974       | 438.49                        |

<sup>a</sup> This work, <sup>b</sup> Ref. S1, <sup>c</sup> Ref. S2, <sup>d</sup> Ref. S3, <sup>e</sup> Ref. S4

**Table S2.** Experimental (Exp.) and theoretical (Th.) fractional coordinates corresponding to the  $R\text{-}3m$  phase of  $\beta\text{-As}_2\text{Te}_3$  at ambient conditions.

| Atoms | Site | Character                     | x | y | z         |
|-------|------|-------------------------------|---|---|-----------|
| Te1   | 3a   | Exp. (sample #1) <sup>a</sup> | 0 | 0 | 0         |
|       |      | Exp. (sample #2) <sup>a</sup> |   |   |           |
|       |      | Th. PBE+D3 <sup>a</sup>       |   |   |           |
|       |      | Th. PBEsol <sup>a</sup>       |   |   |           |
|       |      | Exp <sup>b</sup>              |   |   |           |
|       |      | Th. PBE <sup>c</sup>          |   |   |           |
| Te2   | 6c   | Exp. (sample #1) <sup>a</sup> | 0 | 0 | 0.2153(2) |
|       |      | Exp. (sample #2) <sup>a</sup> |   |   | –         |
|       |      | Th. PBE+D3 <sup>a</sup>       |   |   | 0.21440   |
|       |      | Th. PBEsol <sup>a</sup>       |   |   | 0.21368   |
|       |      | Exp <sup>b</sup>              |   |   | 0.2155(1) |
|       |      | Th. PBE <sup>c</sup>          |   |   | 0.2140    |
| As    | 6c   | Exp. (sample #1) <sup>a</sup> | 0 | 0 | 0.3979(2) |
|       |      | Exp. (sample #2) <sup>a</sup> |   |   | –         |
|       |      | Th. PBE+D3 <sup>a</sup>       |   |   | 0.39700   |
|       |      | Th. PBEsol <sup>a</sup>       |   |   | 0.39705   |
|       |      | Exp <sup>b</sup>              |   |   | 0.3977(1) |
|       |      | Th. PBE <sup>c</sup>          |   |   | 0.3967    |

<sup>a</sup>This work, <sup>b</sup> Ref. S1, <sup>c</sup> Ref. S3

**Table S3.** Unit-cell volume BM3-EoS data from theoretical (PBE+D3) calculations for  $\beta$ -As<sub>2</sub>Te<sub>3</sub>,  $\alpha$ -Sb<sub>2</sub>Te<sub>3</sub>, and  $\alpha$ -Bi<sub>2</sub>Te<sub>3</sub>.

| Compound                                  | Pressure range (GPa) | $V_0$ ( $\text{\AA}^3$ ) | $B_0$ (GPa) | $B_0'$ |
|-------------------------------------------|----------------------|--------------------------|-------------|--------|
| $\beta$ -As <sub>2</sub> Te <sub>3</sub>  | 0 – 9                | 418.4(1)                 | 40.1(4)     | 6.2(3) |
| $\alpha$ -Sb <sub>2</sub> Te <sub>3</sub> | 0 – 8.9              | 488.0(1)                 | 35.6(2)     | 6.1(8) |
| $\alpha$ -Bi <sub>2</sub> Te <sub>3</sub> | 0 – 8.5              | 514.5(8)                 | 36.0(1)     | 6.3(4) |

**Table S4.** Experimental Pressure Coefficients of the four Raman-active frequencies of the tetradymite structure in  $\beta$ -As<sub>2</sub>Te<sub>3</sub>,  $\alpha$ -Sb<sub>2</sub>Te<sub>3</sub>, and  $\alpha$ -Bi<sub>2</sub>Te<sub>3</sub>.

|            | $\beta$ -As <sub>2</sub> Te <sub>3</sub> | $\alpha$ -Sb <sub>2</sub> Te <sub>3</sub> | $\alpha$ -Bi <sub>2</sub> Te <sub>3</sub> |
|------------|------------------------------------------|-------------------------------------------|-------------------------------------------|
| $E_g^1$    | 2.5                                      | 2.62 <sup>a</sup>                         | 1.96 <sup>b</sup>                         |
| $A_{1g}^1$ | 4.3                                      | 4.5                                       | 3.7                                       |
| $E_g^2$    | 0.5                                      | 3.6                                       | 3.5                                       |
| $A_{1g}^2$ | 1.3                                      | 3.0                                       | 2.9                                       |

<sup>a</sup> Theoretical data from Ref. S5 since there is no experimental data available.

<sup>b</sup> Theoretical data from Ref. S6 since there is no experimental data available.

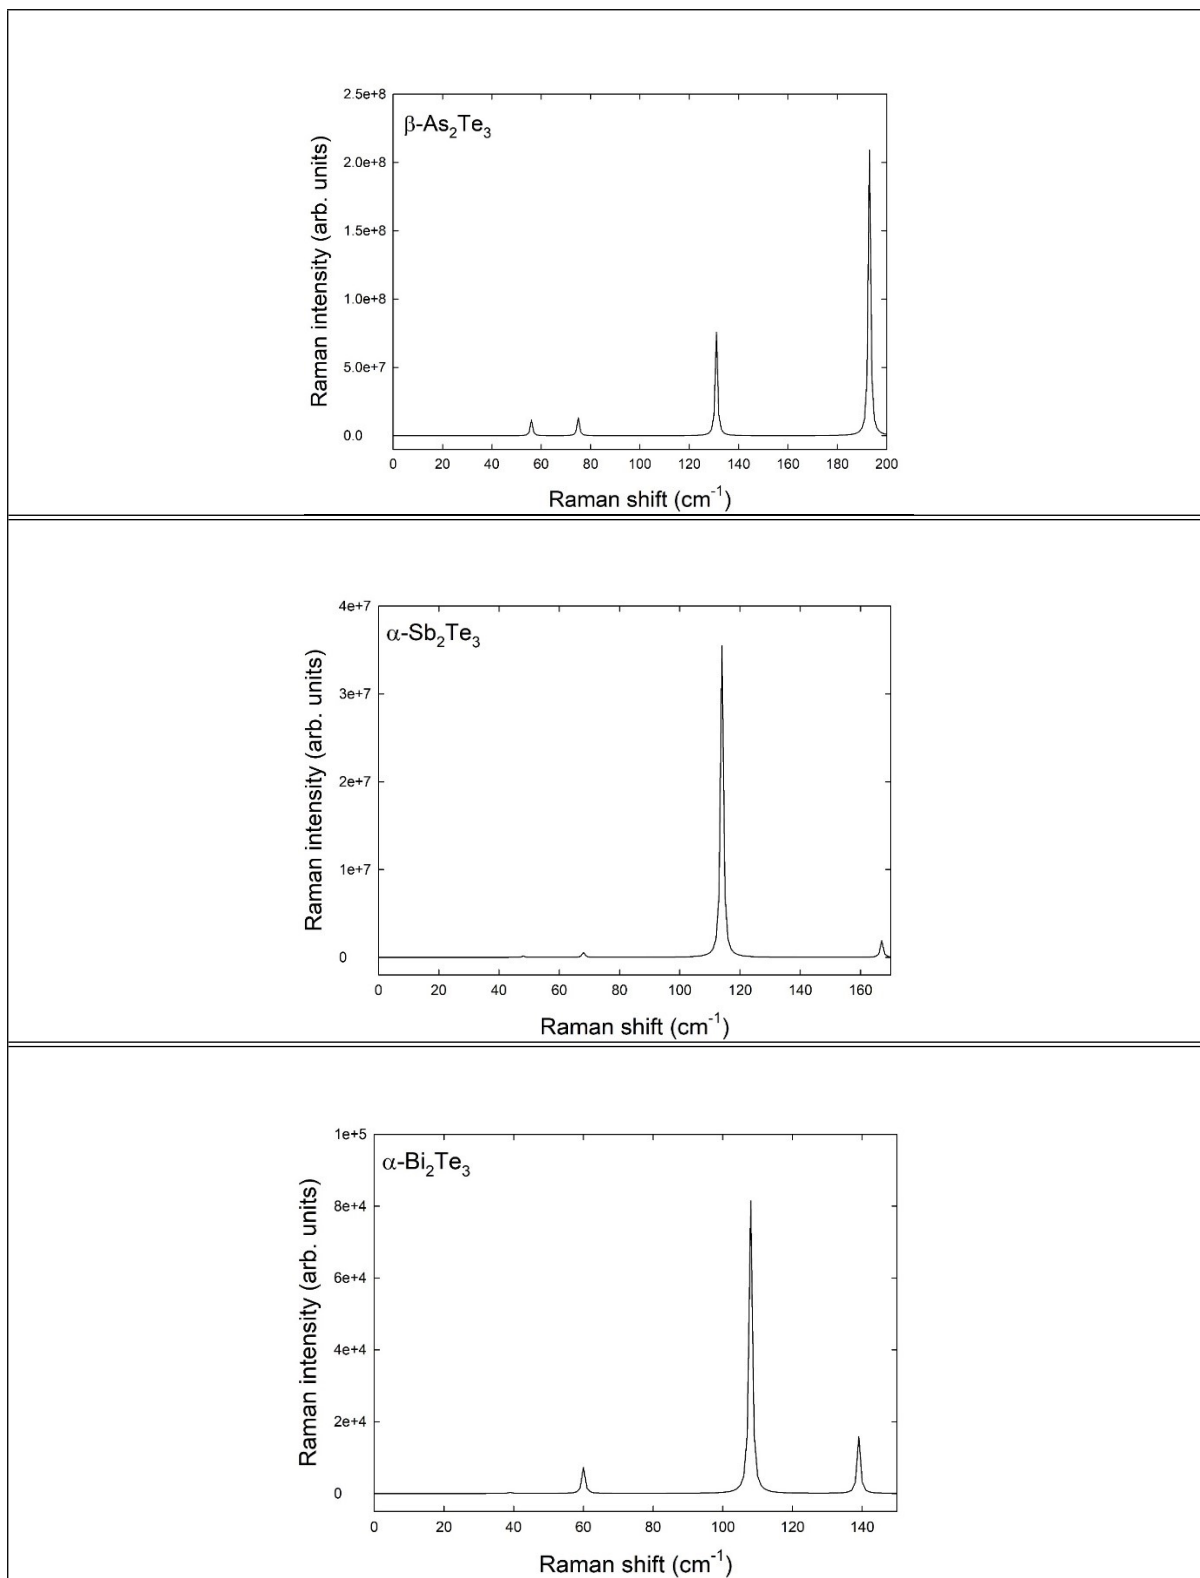

**Fig. S1** Simulation of the unpolarized RS spectra of the  $\beta\text{-As}_2\text{Te}_3$ ,  $\alpha\text{-Sb}_2\text{Te}_3$  and  $\alpha\text{-Bi}_2\text{Te}_3$  at 0 GP  
a)

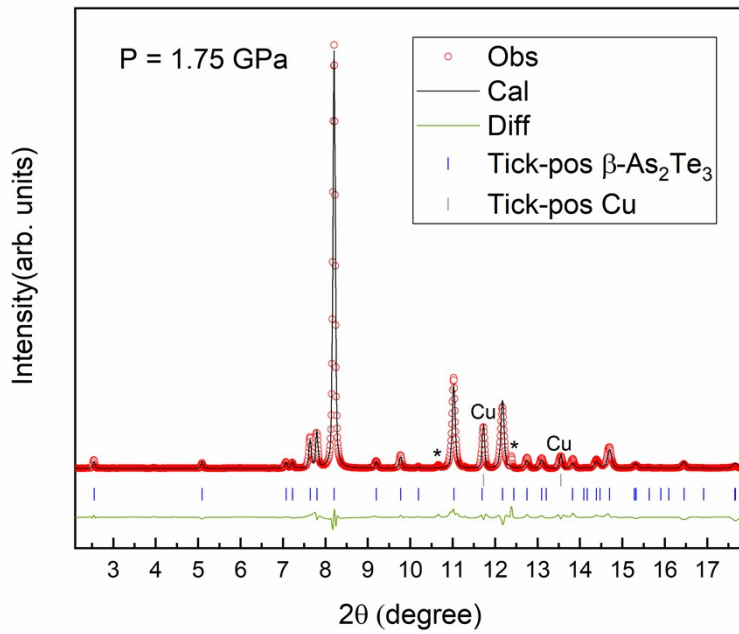

b)

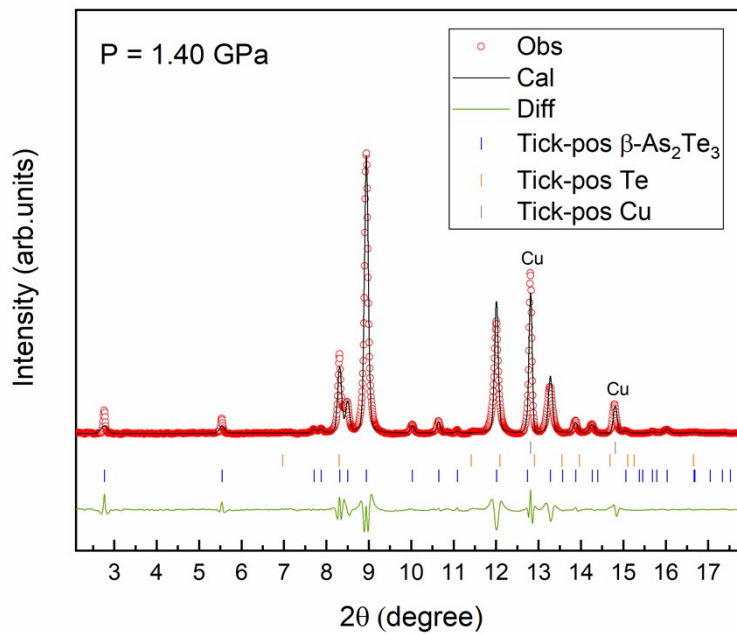

**Figs. S2** a) Rietveld refinement of the  $\beta$  phase at 1.75 GPa of sample #1 and b) at 1.40 GPa of sample #2. Experimental data, calculated profiles, and residuals are plotted as solid black lines, red circles, and solid green lines, respectively. The background has been subtracted. Blue, green, and orange vertical ticks indicate the position of Bragg reflections of the  $\beta$  phase, copper, and Te, respectively.

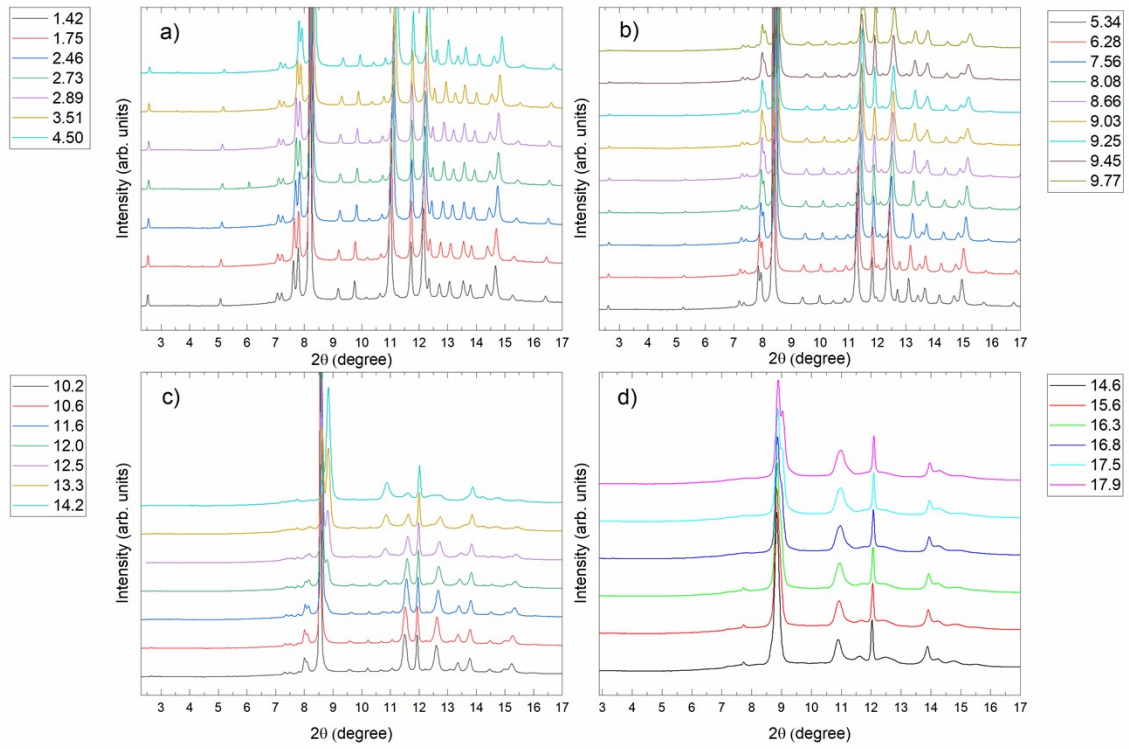

**Fig. S3** Experimental diffraction patterns of the experiment with sample #1 of  $\beta$ -As<sub>2</sub>Te<sub>3</sub> up to 17.9 GPa. The four plots show the XRD patterns in different pressure ranges, as indicated in the legends.

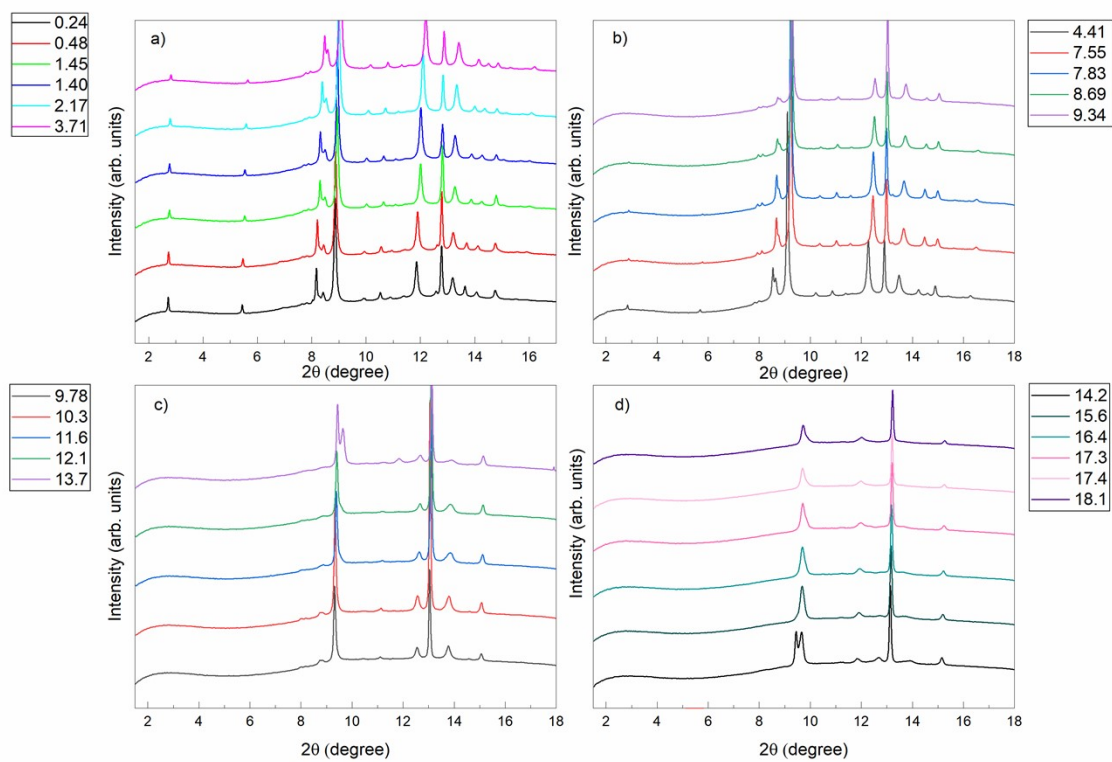

**Fig. S4** Experimental diffraction patterns of the experiment with sample #2 of  $\beta$ -As<sub>2</sub>Te<sub>3</sub> up to 18.1 GPa. The four plots show the XRD patterns in different pressure ranges, as indicated in the legends.



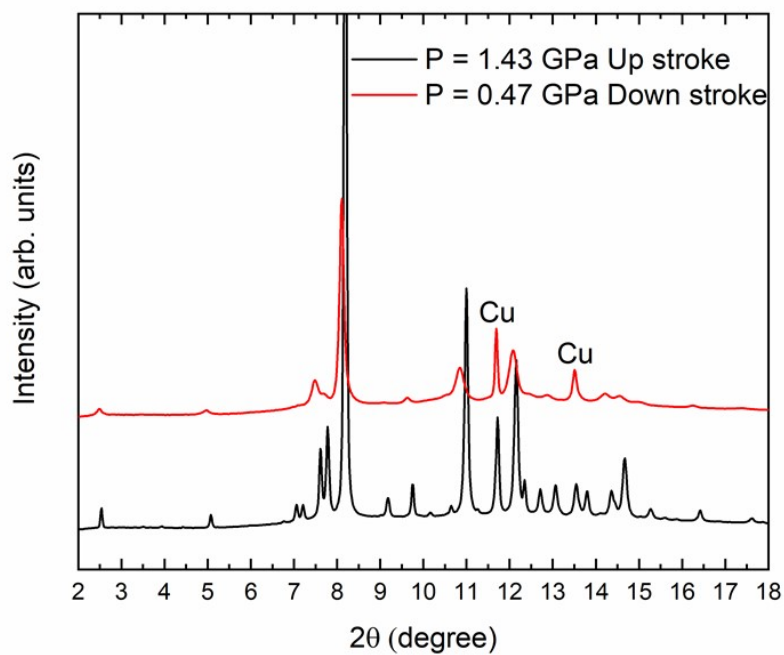

**Fig. S5.** Experimental XRD patterns of sample #1 of  $\beta$ -As<sub>2</sub>Te<sub>3</sub> close to room pressure on upstroke (black color) and downstroke (red color). Copper reflections are indicated.

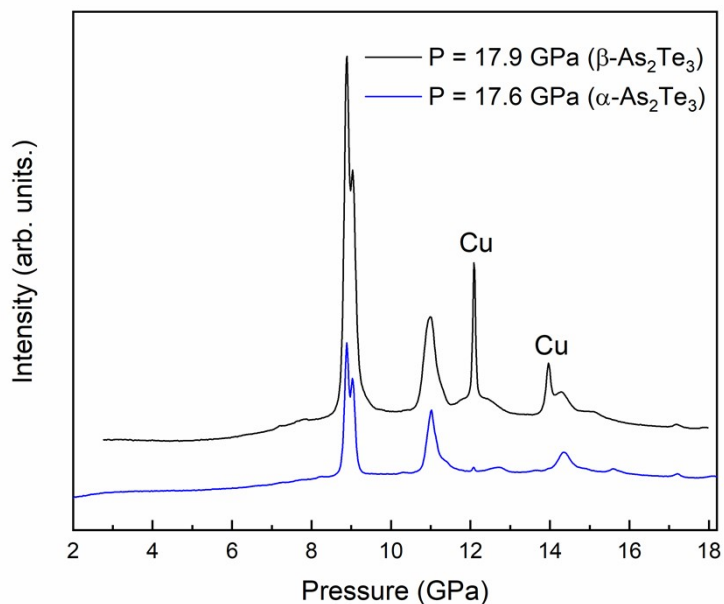

**Fig. S6.** Experimental XRD patterns of sample #1 of  $\beta$ -As<sub>2</sub>Te<sub>3</sub> (black color) and  $\alpha$ -As<sub>2</sub>Te<sub>3</sub> (blue color) at approximately the same pressure near 18 GPa. Copper reflections are indicated.

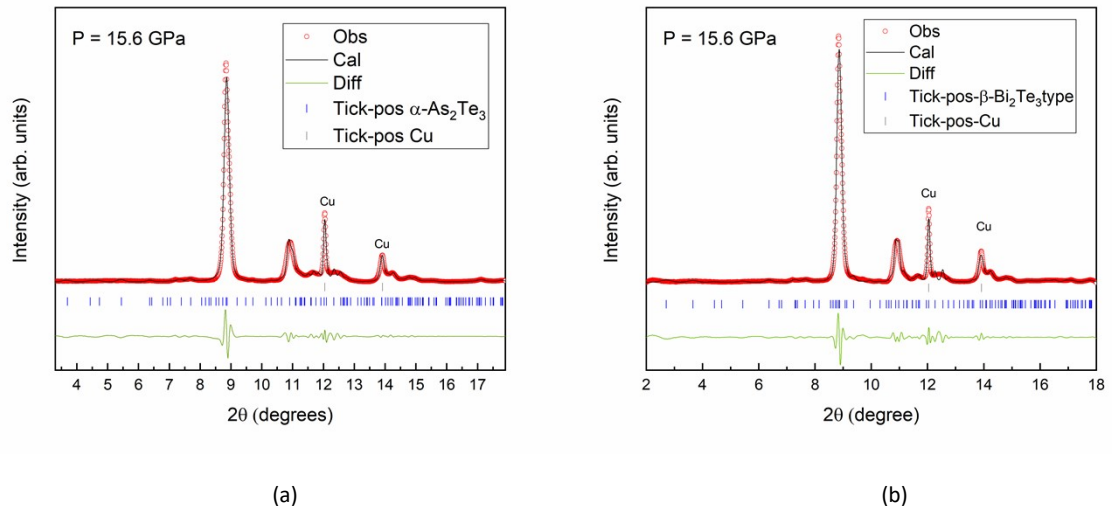

**Fig. S7.** Le Bail analysis of the diffractogram at 15.6 GPa of sample #1 by using two  $C2/m$  phases such as  $\alpha$ -As<sub>2</sub>Te<sub>3</sub> (a), and  $\beta$ -Bi<sub>2</sub>Te<sub>3</sub> type (b) where the experimental data, calculated profiles and residuals are plotted as black solid lines, red circles and green solid lines, respectively. The background has been subtracted. Black vertical ticks indicate the position of Bragg reflections calculated and the blue ones the position of the copper reflections.

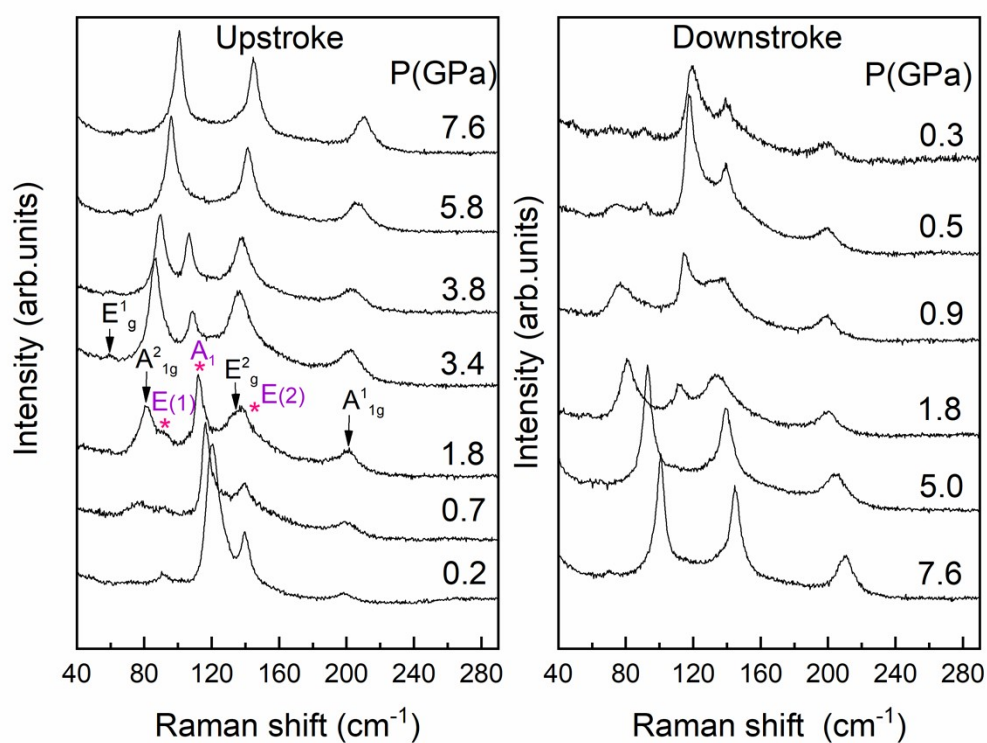

**Fig. S8.** Upstroke and downstroke experimental Raman spectra of  $\beta\text{-As}_2\text{Te}_3$  at different pressures up and from to 7.6 GPa for sample #2, respectively. The four Raman modes are indicated with black arrows and three modes of the tellurium with magenta asterisks

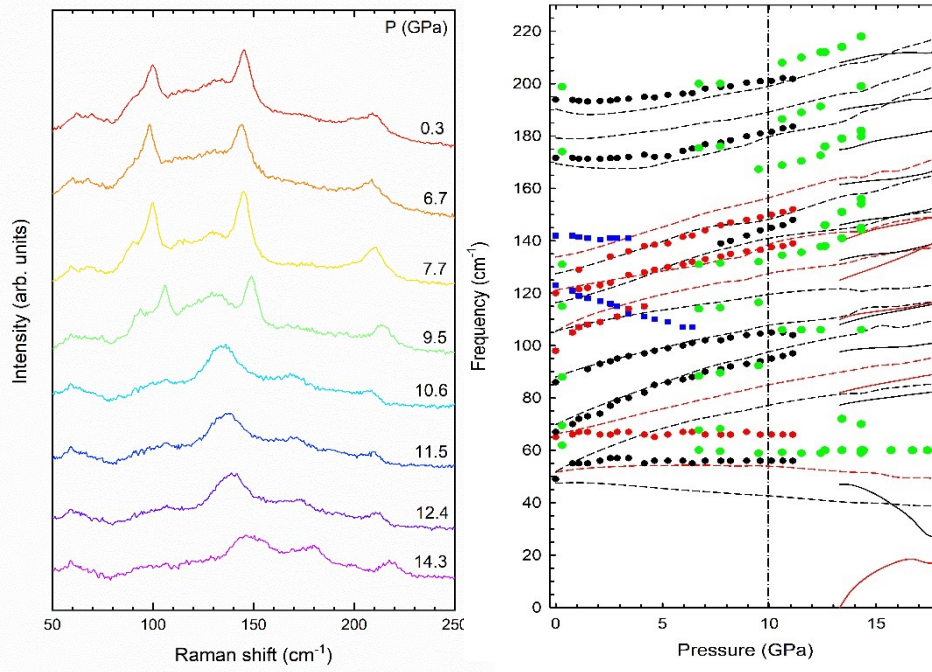

**Fig. S9.** (a) Downstroke of sample #1 from 14.3 GPa to 0.3 GPa. (b) Pressure dependence of the Raman frequencies of the broad bands of (a) on downstroke (green circles). They can be compared to experimental Raman modes of  $\alpha\text{-As}_2\text{Te}_3$  (black and red circles taken from Ref. S7) as well as with theoretical (PBE+D3) frequencies for  $\alpha\text{-As}_2\text{Te}_3$  (dashed lines) and for the  $\beta\text{-Bi}_2\text{Te}_3$  phase of  $\text{As}_2\text{Te}_3$  (solid lines above 13.3 GPa). The vertical dashed dotted line indicates the pressure at which the HP phase reverts to the low-pressure phase.

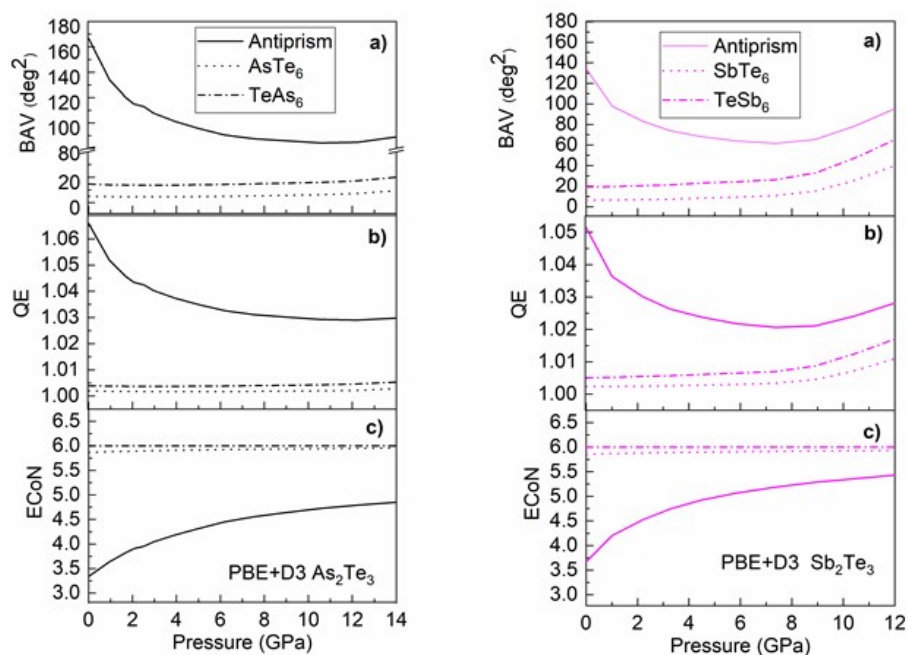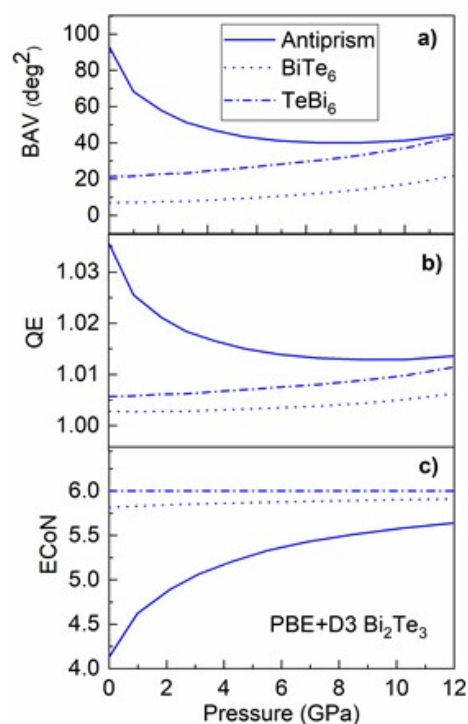

**Fig. S10.** Theoretical (PBE+D3) pressure dependence of the bond angle variance (BAV) (a), quadratic elongation (QE) (b), and effective coordination number (ECoN) (c) of the  $\text{XTe}_6$  and  $\text{TeX}_6$  octahedrons and of the octahedron associated with the antiprism for  $\beta\text{-As}_2\text{Te}_3$ ,  $\alpha\text{-Sb}_2\text{Te}_3$  and  $\alpha\text{-Bi}_2\text{Te}_3$  in black, magenta and blue colors, respectively.

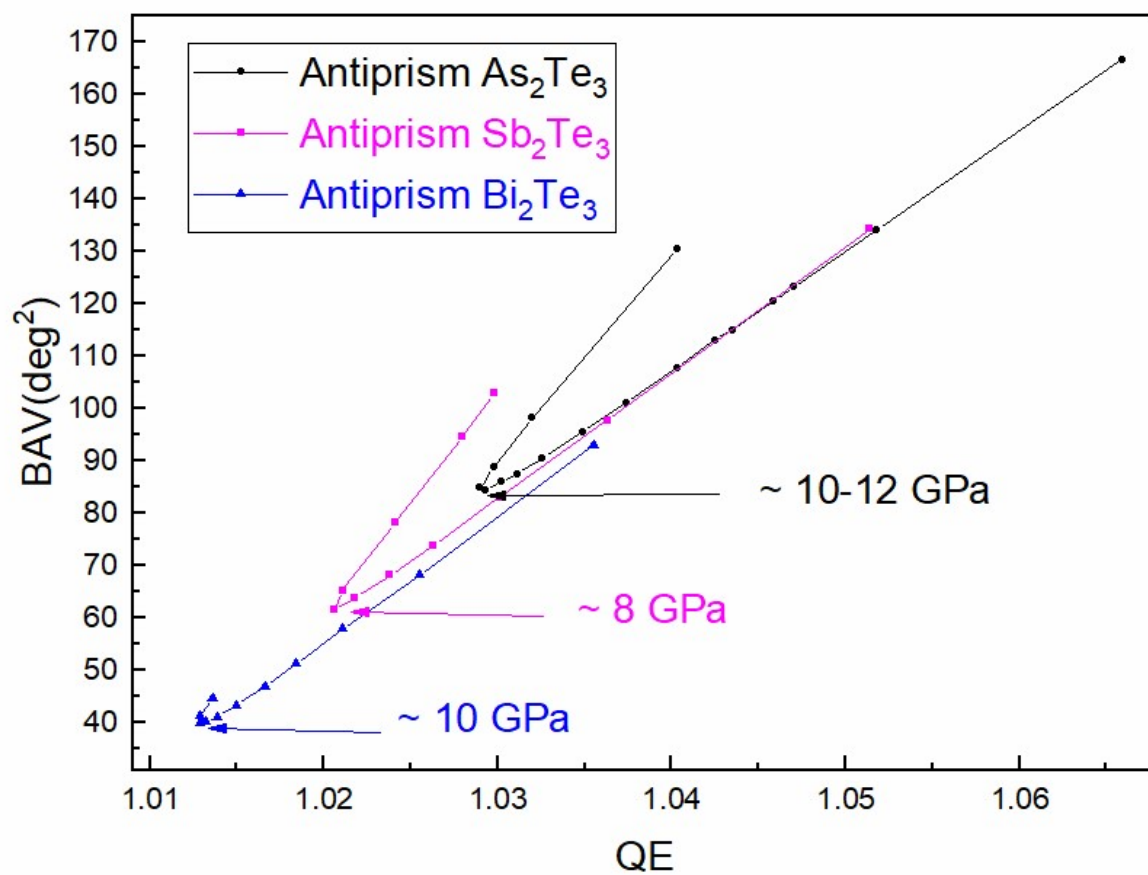

**Figure S11.** Bond angle variance (BAV) vs. quadratic elongation (QE) of the Te<sub>2</sub> antiprism in  $\beta$ -As<sub>2</sub>Te<sub>3</sub>,  $\alpha$ -Sb<sub>2</sub>Te<sub>3</sub>, and  $\alpha$ -Bi<sub>2</sub>Te<sub>3</sub>. The pressure at which we observed slope changes are indicated with arrows.

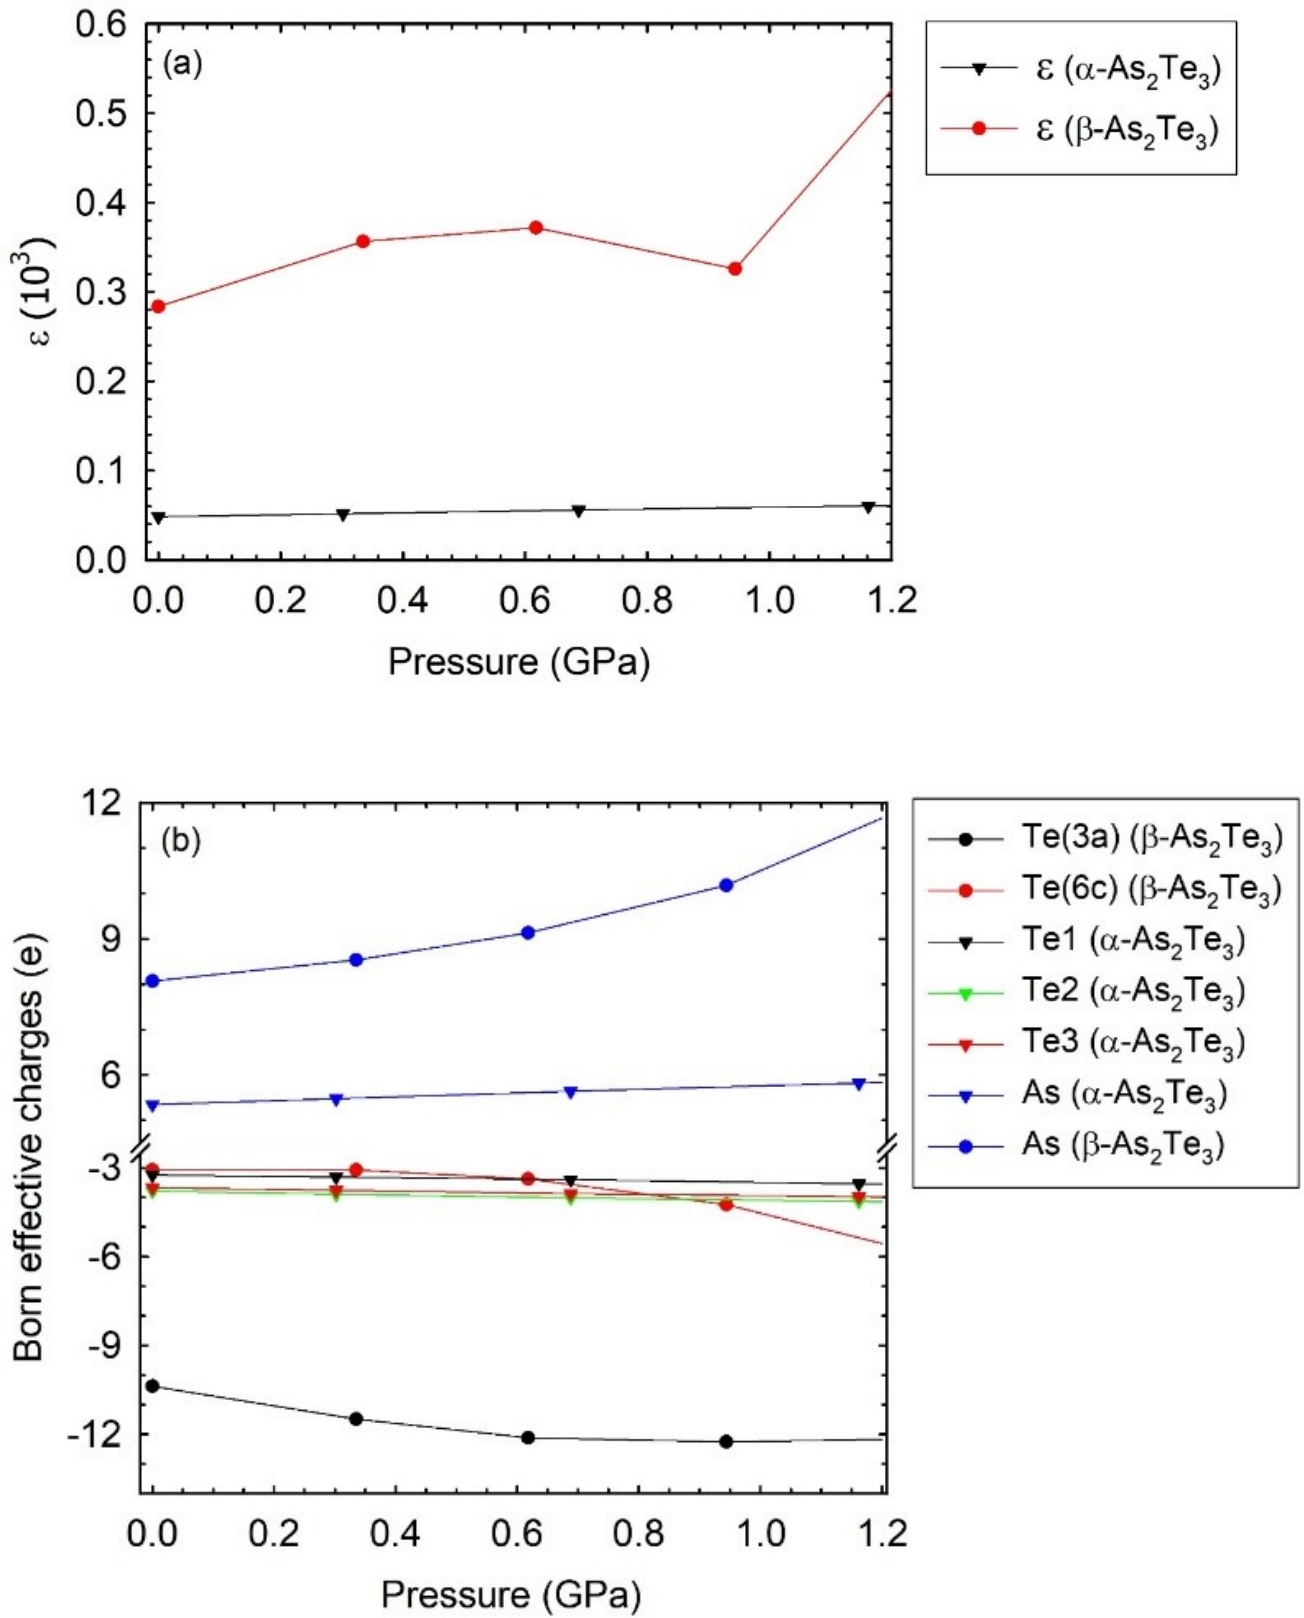

**Fig. S12.** Theoretical (PBE+D3) pressure dependence of the optical dielectric constant (a) and Born effective charges (b) in  $\beta$ -As<sub>2</sub>Te<sub>3</sub> and  $\alpha$ -As<sub>2</sub>Te<sub>3</sub>.

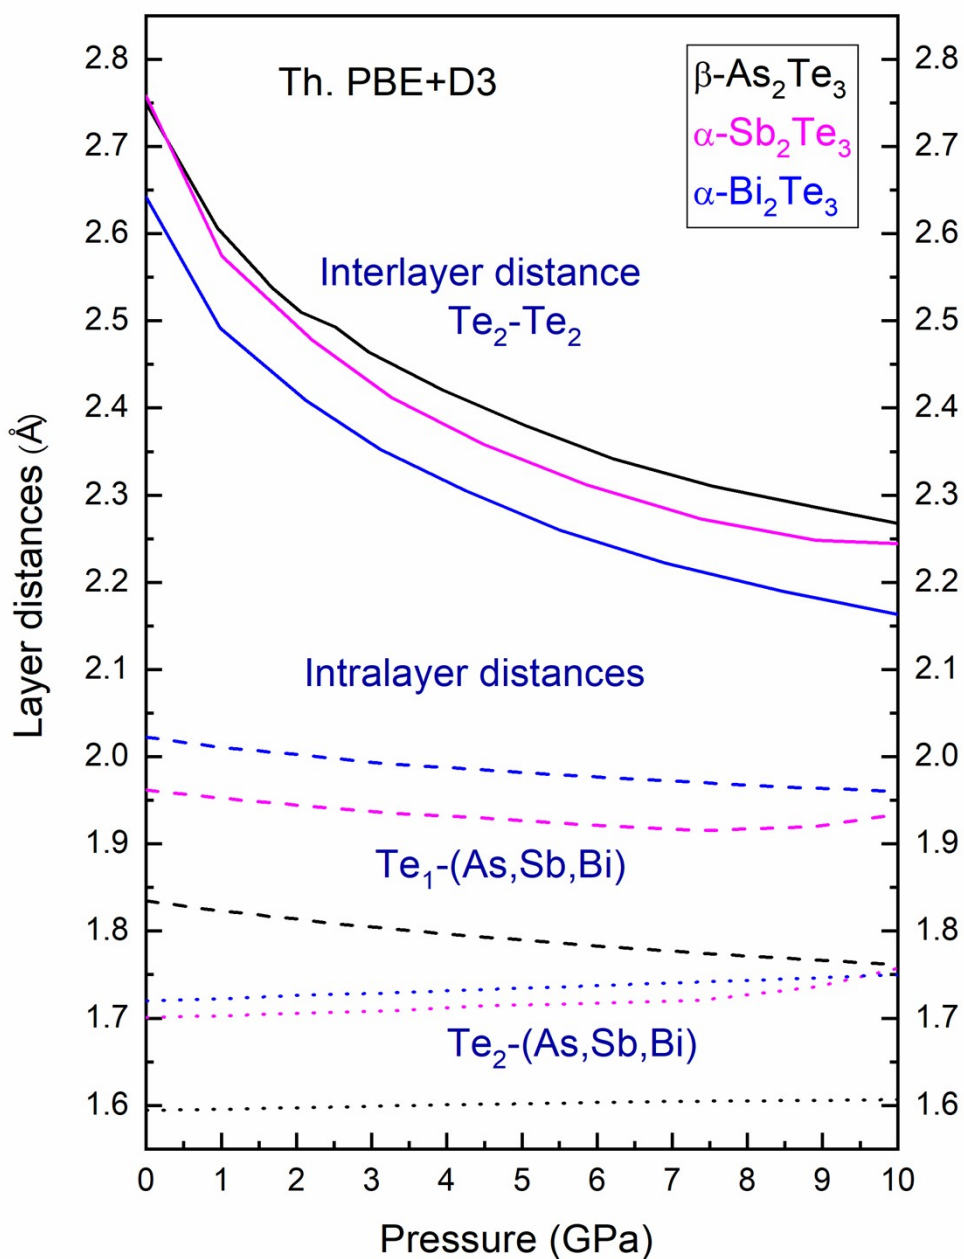

Fig. S13. Pressure dependence of the theoretical (PBE+D3) interlayer and intralayer distances for isostructural  $\beta\text{-As}_2\text{Te}_3$ ,  $\alpha\text{-Sb}_2\text{Te}_3$  and  $\alpha\text{-Bi}_2\text{Te}_3$ . The continuous, dashed, dash-dotted lines indicate the interlayer distance Te<sub>2</sub>-Te<sub>2</sub> and the intralayer distances Te<sub>1</sub>-(As, Sb, Bi) and Te<sub>2</sub>-(As, Sb, Bi), respectively. Note that values of  $\alpha\text{-Sb}_2\text{Te}_3$  above 7.5 GPa are not reliable because of problems in the relaxation of the  $R\text{-}3m$  structure of this compound above that pressure.



## References

- S1. Morin, C.; Corallini, S.; Carreaud, J.; Vaney, J.-B.; Delaizir, G.; Crivello, J.-C.; Lopes, E. B.; Piarristeguy, A.; Monnier, J.; Candolfi, C. Polymorphism in thermoelectric As<sub>2</sub>Te<sub>3</sub>. *Inorganic chemistry* **2015**, *54*, 9936-9947.
- S2. Shu, H. W.; Jaulmes, S.; Flahaut, J. Systeme As/1bTe-Mise en evidence et etude structurale d'une nouvelle variete de As<sub>2</sub>Te<sub>3</sub> metastable. *Materials research bulletin* **1986**, *21*, 1509-1514.
- S3. Deng, H. Theoretical prediction of the structural, electronic, mechanical and thermodynamic properties of the binary  $\alpha$ -As<sub>2</sub>Te<sub>3</sub> and  $\beta$ -As<sub>2</sub>Te<sub>3</sub>. *Journal of Alloys and Compounds* **2016**, *656*, 695-701.
- S4. Sharma, Y.; Srivastava, P. First principles investigation of electronic, optical and transport properties of  $\alpha$ -and  $\beta$ -phase of arsenic telluride. *Optical Materials* **2011**, *33*, 899-904.
- S5. Gomis, O.; Vilaplana, R.; Manjón, F.; Rodríguez-Hernández, P.; Pérez-González, E.; Muñoz, A.; Kucek, V.; Drasar, C. Lattice dynamics of Sb<sub>2</sub>Te<sub>3</sub> at high pressures. *Physical Review B* **2011**, *84*, 174305.
- S6. Vilaplana, R.; Gomis, O.; Manjón, F.; Segura, A.; Pérez-González, E.; Rodríguez-Hernández, P.; Muñoz, A.; González, J.; Marín-Borrás, V.; Muñoz-Sanjosé, V. High-pressure vibrational and optical study of Bi<sub>2</sub>Te<sub>3</sub>. *Physical Review B* **2011**, *84*, 104112.
- S7. Cuenca-Gotor, V. P.; Sans, J.; Ibáñez, J.; Popescu, C.; Gomis, O.; Vilaplana, R.; Manjón, F.; Leonardo, A.; Sagasta, E.; Suárez-Alcubilla, A. Structural, vibrational, and electronic study of  $\alpha$ -As<sub>2</sub>Te<sub>3</sub> under compression. *The Journal of Physical Chemistry C* **2016**, *120*, 19340-19352.
